# Supplementary material for: Racial and Ethnic Disparities in Health of Adults in the United States: A 20-Year National Health Interview Survey Analysis, 1999-2018
Source: bioRxiv or medRxiv preprint supplement (doi:10.1101/2020.10.30.20223487), 2020-11-04
Supplement: Supplementary file [file media-1.pdf]

## **SUPPLEMENTAL MATERIAL**

### **Racial and Ethnic Disparities in Health of Adults in the United States: A Twenty-Year National Health Interview Survey Analysis, 1999-2018**

#### **Table of contents:**

eFigure 1. Flowchart of study population.

eFigure 2. Distribution of hours of sleep per day by race/ethnicity.

eTable 1. Sociodemographic and clinical characteristics of the study population during the first two years (1999 and 2000) and the last two years (2017 and 2018) of the study period by race/ethnicity.

**eFigure 1. Flowchart showing selection of the study population.**

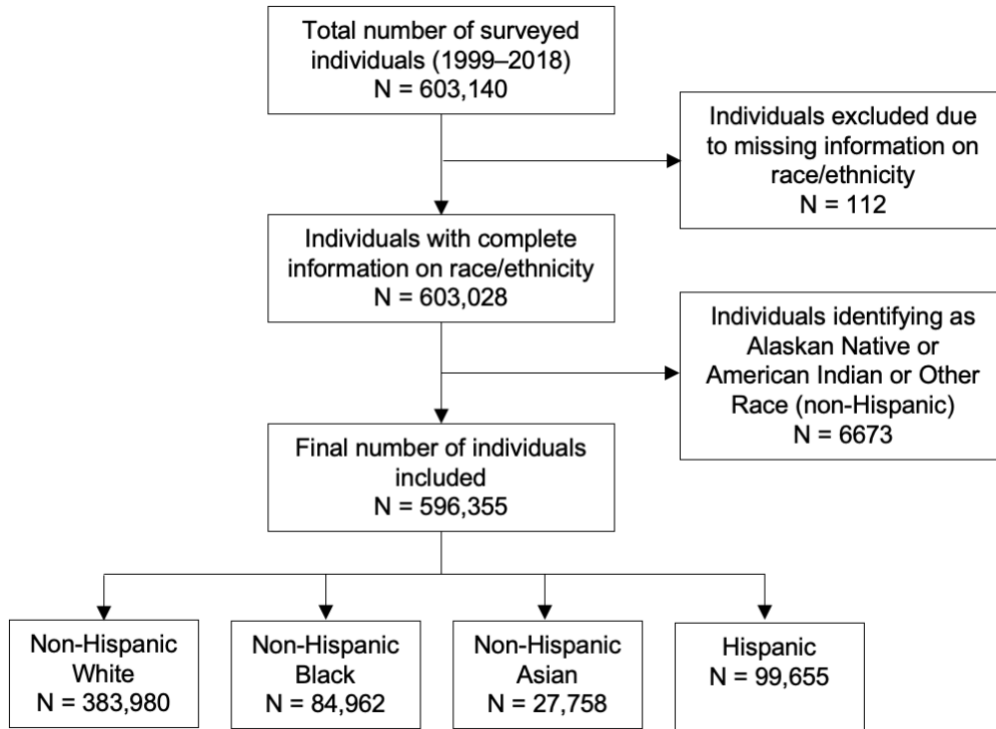

**eFigure 2. Distribution of hours of sleep per day by race/ethnicity.**

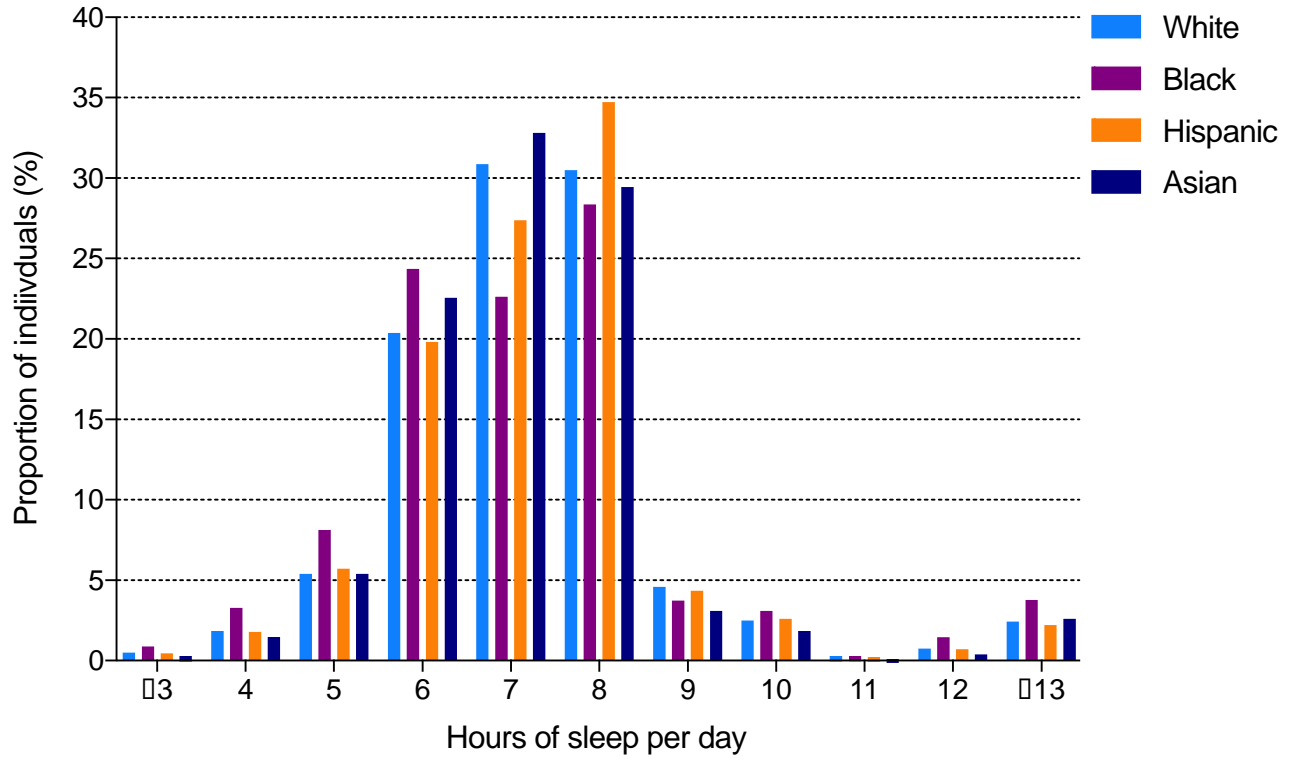

**eTable 1. Sociodemographic and clinical characteristics of the study population during the first two years (1999 and 2000) and the last two years (2017 and 2018) of the study period by race/ethnicity.**

| Characteristics           | Non-Hispanic White            |                               | Hispanic                     |                              | Non-Hispanic Black           |                              | Non-Hispanic Asian         |                                 |
|---------------------------|-------------------------------|-------------------------------|------------------------------|------------------------------|------------------------------|------------------------------|----------------------------|---------------------------------|
|                           | 1999-2000                     | 2017-2018                     | 1999-2000                    | 2017-2018                    | 1999-2000                    | 2017-2018                    | 1999-2000                  | 2017-2018                       |
|                           | n (% <b>, 95% CI)</b>         | n (% <b>, 95% CI)</b>         | n (% <b>, 95% CI)</b>        | n (% <b>, 95% CI)</b>        | n (% <b>, 95% CI)</b>        | n (% <b>, 95% CI)</b>        | n (% <b>, 95% CI)</b>      | n (% <b>, 95% CI)</b>           |
| <b>Total</b>              | 41,882                        | 36,410                        | 10,305                       | 6,423                        | 8,758                        | 5,884                        | 1,597                      | 2,640                           |
| <b>Age (years)</b>        |                               |                               |                              |                              |                              |                              |                            |                                 |
| 18–39                     | 15,169 (39.5%<br>[38.9–40.2]) | 10,050 (33.3%<br>[32.6–34.1]) | 3,610 (37.1%<br>[35.0–39.2]) | 2,886 (50.1%<br>[48.4–51.8]) | 3,862 (49.8%<br>[48.3–51.3]) | 1,994 (43.7%<br>[41.8–45.6]) | 844 (52.4%<br>[49.2–55.6]) | 1,085 (41.9%<br>[39.3–44.6])    |
| 40–64                     | 17,246 (42.2%<br>[41.5–42.8]) | 14,919 (42.3%<br>[41.6–43.0]) | 6,617 (62.1%<br>[60.0–64.2]) | 2,492 (39.1%<br>[37.6–40.6]) | 3,539 (38.5%<br>[37.1–39.8]) | 2,434 (41.1%<br>[39.3–42.9]) | 581 (38.3%<br>[35.1–41.4]) | 1,005 (42.5%<br>[40.2–44.9])    |
| ≥65                       | 9,467 (18.3%<br>[17.8–18.8])  | 11,441 (24.4%<br>[23.7–25.1]) | 78 (0.8%<br>[0.6–1.1])       | 1,045 (10.8%<br>[9.9–11.8])  | 1,357 (11.8%<br>[11.0–12.6]) | 1,456 (15.3%<br>[14.2–16.3]) | 172 (9.4%<br>[7.8–11.4])   | 550 (15.5%<br>[13.9–17.4])      |
| <b>Sex</b>                |                               |                               |                              |                              |                              |                              |                            |                                 |
| Men                       | 18,512 (48.1%<br>[47.6–48.7]) | 16,798 (48.6%<br>[48.0–49.3]) | 4,399 (49.4%<br>[48.2–50.6]) | 2,788 (49.7%<br>[48.1–51.4]) | 3,255 (44.4%<br>[43.0–45.9]) | 2,435 (45.5%<br>[43.7–47.2]) | 726 (48.7%<br>[45.4–51.9]) | 1,270 (46.7%<br>[44.4–49.0])    |
| Women                     | 23,370 (51.9%<br>[51.3–52.4]) | 19,612 (51.4%<br>[50.7–52.0]) | 5,906 (50.6%<br>[49.4–51.8]) | 3,635 (50.3%<br>[48.7–51.9]) | 5,503 (55.6%<br>[54.1–57.0]) | 3,449 (54.5%<br>[52.8–56.3]) | 871 (51.4%<br>[48.1–54.6]) | 1,370<br>(53.3%<br>[51.1–55.6]) |
| <b>Citizenship status</b> |                               |                               |                              |                              |                              |                              |                            |                                 |
| US citizen                | 41,177 (98.3%<br>[98.2–98.5]) | 35,943 (98.4%<br>[98.2–98.6]) | 6,617 (62.1%<br>[60.0–64.2]) | 4,694 (71.5%<br>[69.8–73.3]) | 8,385 (95.2%<br>[94.5–95.8]) | 5,655 (94.8%<br>[93.6–95.8]) | 921 (57.1%<br>[53.5–60.6]) | 1,844 (69.9%<br>[67.2–72.4])    |
| Non-US citizen            | 672 (1.6%<br>[1.5–1.8])       | 446 (1.5% [1.3–<br>1.7])      | 3,610 (37.1%<br>[35.0–39.2]) | 1,664 (27.4%<br>[25.7–29.1]) | 360 (4.6%<br>[4.0–5.3])      | 220 (5.1%<br>[4.1–6.2])      | 658 (41.6%<br>[38.0–45.2]) | 775 (29.2%<br>[26.7–31.8])      |
| Unknown                   | 33 (0.0% [0.0–<br>0.0])       | 21 (0.0% [0.0–<br>0.1])       | 78 (0.8%<br>[0.6–1.1])       | 65 (1.1%<br>[0.8–1.6])       | 13 (0.2%<br>[0.0–0.4])       | 9 (0.1% [0.0–<br>0.3])       | 18 (1.3%<br>[0.7–2.4])     | 21 (0.9%<br>[0.5–1.7])          |
| <b>Education level</b>    |                               |                               |                              |                              |                              |                              |                            |                                 |
| Less than high school     | 5,770 (13.3%<br>[12.8–13.8])  | 2,708 (7.4%<br>[6.9–7.9])     | 4,810 (44.0%<br>[42.4–45.7]) | 1,831 (27.5%<br>[25.7–29.4]) | 2,228 (24.1%<br>[22.8–25.5]) | 948 (14.1%<br>[12.8–15.6])   | 179 (11.2%<br>[9.3–13.5])  | 221 (7.9%<br>[6.6–9.4])         |

|                          |                               |                               |                                 |                              |                              |                              |                              |                              |
|--------------------------|-------------------------------|-------------------------------|---------------------------------|------------------------------|------------------------------|------------------------------|------------------------------|------------------------------|
| High school diploma /GED | 12,918 (31.5%<br>[30.8–32.1]) | 8,710 (23.6%<br>[22.8–24.3])  | 2,394<br>(24.0%<br>[22.9–25.0]) | 1,615 (26.4%<br>[24.8–28.0]) | 2,569 (31.1%<br>[29.8–32.4]) | 1,646 (28.7%<br>[27.1–30.3]) | 276 (17.7%<br>[15.8–19.8])   | 383 (15.2%<br>[13.4–17.3])   |
| Some college             | 12,147 (29.3%<br>[28.8–29.8]) | 11,509 (31.3%<br>[30.5–32.0]) | 2,086 (21.4%<br>[20.2–22.6])    | 1,737 (27.8%<br>[26.3–29.4]) | 2,558 (29.3%<br>[28.0–30.6]) | 1,905 (32.7%<br>[31.0–34.5]) | 367 (23.8%<br>[21.3–26.5])   | 546 (20.6%<br>[18.7–22.8])   |
| ≥Bachelor's degree       | 10,685 (25.2%<br>[24.5–25.9]) | 13,386 (37.5%<br>[36.4–38.6]) | 888 (9.2%<br>[8.4–10.1])        | 1,193 (17.3%<br>[15.9–18.8]) | 1,300 (14.3%<br>[13.2–15.5]) | 1,347 (23.9%<br>[22.0–25.9]) | 750 (45.6%<br>[42.6–48.6])   | 1,478 (55.6%<br>[52.5–58.6]) |
| Unknown                  | 362 (0.8%<br>[0.7–0.9])       | 97 (0.3% [0.2–<br>0.4])       | 127 (1.4%<br>[1.1–1.8])         | 47 (1.0%<br>[0.7–1.5])       | 103 (1.3%<br>[1.0–1.6])      | 38 (0.6%<br>[0.4–0.9])       | 25 (1.8%<br>[1.2–2.7])       | 12 (0.7%<br>[0.3–1.5])       |
| <b>Family income</b>     |                               |                               |                                 |                              |                              |                              |                              |                              |
| High/middle income       | 30,643 (77.0%<br>[76.4–77.6]) | 27,211 (78.8%<br>[77.9–79.6]) | 4,412 (49.3%<br>[47.6–50.9])    | 3,165 (53.5%<br>[51.4–55.5]) | 4,372 (54.5%<br>[52.5–56.5]) | 2,961 (55.3%<br>[52.9–57.6]) | 1,082 (71.8%<br>[68.3–75.1]) | 1,886 (73.8%<br>[71.0–76.5]) |
| Low income               | 11,239 (23.0%<br>[22.4–23.6]) | 9,199 (21.2%<br>[20.4–22.1])  | 5,893 (50.7%<br>[49.1–52.4])    | 3,258 (46.5%<br>[44.5–48.6]) | 4,386 (45.5%<br>[43.6–47.5]) | 2,923 (44.7%<br>[42.4–47.1]) | 515 (28.2%<br>[24.9–31.7])   | 754 (26.2%<br>[23.5–29.0])   |
| <b>Insurance status</b>  |                               |                               |                                 |                              |                              |                              |                              |                              |
| Insured                  | 37,216 (88.7%<br>[88.3–89.1]) | 34,050 (93.2%<br>[92.8–93.6]) | 6,669 (63.4%<br>[61.6–65.2])    | 4,937 (75.4%<br>[73.4–77.2]) | 7,036 (78.9%<br>[77.8–80.0]) | 5,216 (87.0%<br>[85.6–88.3]) | 1,329 (82.3%<br>[80.0–84.5]) | 2,469 (93.2%<br>[91.8–94.3]) |
| Uninsured                | 4,522 (11.0%<br>[10.6–11.4])  | 2,270 (6.5%<br>[6.2–6.9])     | 3,591 (36.1%<br>[34.3–37.9])    | 1,454 (23.8%<br>[22.0–25.8]) | 1,663 (20.1%<br>[19.1–21.2]) | 632 (11.9%<br>[10.7–13.4])   | 260 (17.3%<br>[15.1–19.7])   | 163 (6.3%<br>[5.2–7.6])      |
| Unknown                  | 144 (0.3%<br>[0.3–0.4])       | 90 (0.3% [0.2–<br>0.4])       | 45 (0.5%<br>[0.4–0.7])          | 32 (0.8%<br>[0.5–1.3])       | 59 (1.0%<br>[0.7–1.3])       | 36 (1.1%<br>[0.7–1.7])       | 8 (0.4%<br>[0.2–0.9])        | 8 (0.6%<br>[0.3–1.2])        |
| <b>Region</b>            |                               |                               |                                 |                              |                              |                              |                              |                              |
| Northeast                | 8,168 (20.2%<br>[19.5–21.0])  | 6,431 (19.2%<br>[17.5–21.1])  | 1,639 (15.7%<br>[14.5–17.1])    | 789 (13.5%<br>[11.2–16.2])   | 1,582 (18.0%<br>[16.7–19.4]) | 733 (16.0%<br>[13.5–18.8])   | 333 (21.2%<br>[18.7–24.0])   | 493 (20.8%<br>[16.9–25.4])   |
| Midwest                  | 12,012 (29.4%<br>[28.5–30.3]) | 10,273 (27.4%<br>[25.7–29.3]) | 637 (7.9%<br>[6.9–9.1])         | 640 (9.4%<br>[7.6–11.6])     | 1,698 (18.8%<br>[17.2–20.5]) | 914 (15.2%<br>[13.0–17.8])   | 214 (14.7%<br>[11.9–18.0])   | 325 (11.8%<br>[9.5–14.6])    |
| South                    | 13,935 (33.9%<br>[33.0–34.8]) | 11,884 (33.0%<br>[30.9–35.2]) | 3,729 (35.4%<br>[33.2–37.8])    | 2,614 (37.1%<br>[32.5–42.0]) | 4,645 (55.7%<br>[53.4–57.9]) | 3,754 (60.5%<br>[56.7–64.3]) | 298 (18.9%<br>[16.4–21.8])   | 683 (25.5%<br>[21.6–30.0])   |
| West                     | 7,767 (16.5%<br>[15.8–17.2])  | 7,822 (20.4%<br>[18.3–22.7])  | 4,300 (40.9%<br>[38.6–43.3])    | 2,380 (40.0%<br>[35.3–44.8]) | 833 (7.6%<br>[6.7–8.5])      | 483 (8.3%<br>[6.9–9.9])      | 752 (45.2%<br>[41.2–49.2])   | 1,139 (41.8%<br>[36.7–47.1]) |
| <b>Marital status</b>    |                               |                               |                                 |                              |                              |                              |                              |                              |

|                                |                               |                               |                              |                              |                              |                              |                              |                              |
|--------------------------------|-------------------------------|-------------------------------|------------------------------|------------------------------|------------------------------|------------------------------|------------------------------|------------------------------|
| Unmarried                      | 20,259 (38.3%<br>[37.5–39.0]) | 19,152 (43.6%<br>[42.8–44.3]) | 4,953 (41.3%<br>[40.2–42.5]) | 3,569 (50.6%<br>[48.9–52.2]) | 6,232 (62.2%<br>[60.8–63.7]) | 4,364 (67.2%<br>[65.5–68.9]) | 664 (35.5%<br>[32.5–38.6])   | 1,123 (34.9%<br>[32.5–37.4]) |
| Married/Living with partner    | 21,431 (61.4%<br>[60.6–62.1]) | 17,179 (56.3%<br>[55.5–57.0]) | 5,302 (58.3%<br>[57.1–59.4]) | 2,840 (49.1%<br>[47.5–50.7]) | 2,459 (37.1%<br>[35.7–38.6]) | 1,502 (32.6%<br>[30.9–34.3]) | 923 (64.0%<br>[61.0–67.0])   | 1,509 (64.9%<br>[62.4–67.4]) |
| Unknown                        | 192 (0.3%<br>[0.3–0.4])       | 79 (0.2% [0.1–0.2])           | 50 (0.4%<br>[0.3–0.5])       | 14 (0.4%<br>[0.2–0.6])       | 67 (0.6%<br>[0.5–0.9])       | 18 (0.3 [0.2–0.4])           | 10 (0.5%<br>[0.3–0.9])       | 8 (0.2%<br>[0.0–0.5])        |
| <b>Employment Status</b>       |                               |                               |                              |                              |                              |                              |                              |                              |
| With a job/Working             | 26,251 (65.6%<br>[65.0–66.3]) | 20,990 (62.1%<br>[61.3–62.9]) | 6,430 (66.1%<br>[64.9–67.4]) | 4,075 (66.5%<br>[64.7–68.3]) | 5,410 (63.9%<br>[62.4–65.4]) | 3,248 (61.0%<br>[59.0–63.1]) | 1,029 (65.9%<br>[63.2–68.5]) | 1,667 (67.1%<br>[64.9–69.3]) |
| Not in labor force             | 15,037 (32.9%<br>[32.2–33.6]) | 14,581 (35.4%<br>[34.6–36.2]) | 3,579 (31.1%<br>[29.9–32.3]) | 2,138 (29.8%<br>[28.0–31.8]) | 3,020 (31.9%<br>[30.5–33.4]) | 2,308 (32.4%<br>[30.5–34.3]) | 530 (31.7%<br>[29.1–34.4])   | 907 (30.0%<br>[27.8–32.3])   |
| Unemployed                     | 562 (1.4%<br>[1.2–1.5])       | 824 (2.5% [2.3–2.7])          | 276 (2.5%<br>[2.2–2.9])      | 208 (3.6%<br>[3.0–4.3])      | 308 (3.9%<br>[3.4–4.6])      | 324 (6.5%<br>[5.7–7.4])      | 35 (2.2%<br>[1.5–3.1])       | 64 (2.8%<br>[2.1–3.7])       |
| Unknown                        | 32 (0.1% [0.1–0.1])           | 15 (0.0% [0.0–0.1])           | 20 (0.3%<br>[0.2–0.4])       | 2 (0.02%<br>[0.0–0.1])       | 20 (0.3%<br>[0.2–0.4])       | 4 (0.1% [0.0–0.3])           | 3 (0.2%<br>[0.0–0.8])        | 2 (0.1%<br>[0.0–0.4])        |
| <b>Comorbidities</b>           |                               |                               |                              |                              |                              |                              |                              |                              |
| Hypertension                   | 10,466 (23.0%<br>[22.5–23.4]) | 13,280 (32.7%<br>[31.9–33.4]) | 1,762 (15.3%<br>[14.4–16.2]) | 1,673 (22.3%<br>[21.0–23.8]) | 2,857 (28.8%<br>[27.6–30.1]) | 2,687 (37.6<br>[35.9–39.3])  | 237 (14.9%<br>[12.9–17.2])   | 670 (24.2%<br>[22.2–26.3])   |
| Diabetes                       | 2,303 (5.2%<br>[5.0–5.4])     | 3,698 (9.1%<br>[8.7–9.4])     | 720 (6.3%<br>[5.8–6.9])      | 766 (10.5%<br>[9.6–11.4])    | 803 (8.2%<br>[7.5–8.9])      | 888 (11.7%<br>[10.8–12.7])   | 57 (3.9%<br>[3.0–5.1])       | 247 (8.9%<br>[7.7–10.3])     |
| Prior stroke/MI                | 2,404 (5.1%<br>[4.9–5.3])     | 2,762 (6.4%<br>[6.1–6.8])     | 307 (2.5%<br>[2.2–2.9])      | 266 (3.3%<br>[2.8–3.9])      | 456 (4.5%<br>[4.0–5.1])      | 484 (6.0%<br>[5.4–6.7])      | 35 (1.7%<br>[1.2–2.2])       | 97 (3.2%<br>[2.5–4.0])       |
| Cancer                         | 3,628 (7.8%<br>[7.5–8.1])     | 5,164 (12.3<br>[11.9–12.8])   | 235 (2.2%<br>[1.9–2.5])      | 289 (3.4%<br>[2.9–3.8])      | 301 (2.9%<br>[2.5–3.4])      | 379 (4.8%<br>[4.3–5.4])      | 31 (1.7%<br>[1.1–2.7])       | 126 (4.3%<br>[3.4–5.3])      |
| Emphysema / Chronic bronchitis | 2,785 (6.2%<br>[5.9–6.5])     | 2,163 (5.3%<br>[5.0–5.6])     | 330 (2.9%<br>[2.5–3.4])      | 231 (2.8%<br>[2.4–3.3])      | 444 (4.3%<br>[3.8–4.7])      | 332 (4.4%<br>[3.7–5.1])      | 35 (1.6%<br>[1.1–2.4])       | 58 (2.0%<br>[1.4–2.7])       |
| <b>Current smoker</b>          | 10,085 (24.2%<br>[23.7–24.8]) | 5,712 (15.1%<br>[14.6–15.7])  | 1,915 (18.3%<br>[17.4–19.3]) | 690 (9.8%<br>[9.0–10.8])     | 2,124 (23.8%<br>[22.6–25.1]) | 973 (14.7%<br>[13.5–16.1])   | 247 (14.9%<br>[12.9–17.2])   | 201 (7.2%<br>[6.0–8.5])      |
| <b>Flu vaccine in past 12m</b> | 13,642 (30.7%<br>[30.0–31.3]) | 17,708 (47.1%<br>[46.4–47.9]) | 1,982 (18.6%<br>[17.5–19.6]) | 2,379 (34.9%<br>[33.3–36.5]) | 1,879 (20.6%<br>[19.7–21.5]) | 2,198 (35.2%<br>[33.4–37.1]) | 426 (26.1%<br>[23.3–29.2])   | 1,270 (48.2%<br>[45.6–50.7]) |

|                                                                                                            |                              |                               |                              |                              |                              |                              |                        |                            |
|------------------------------------------------------------------------------------------------------------|------------------------------|-------------------------------|------------------------------|------------------------------|------------------------------|------------------------------|------------------------|----------------------------|
| <b>Obese (BMI<br/>≥30 kg/m<sup>2</sup>)</b>                                                                | 8,006 (20.2%<br>[19.7–20.6]) | 10,627 (30.3%<br>[29.6–31.0]) | 2,339 (23.0%<br>[21.9–24.1]) | 2,093 (34.0%<br>[32.5–35.6]) | 2,542 (29.1%<br>[28.0–30.2]) | 2,312 (39.4%<br>[37.8–41.1]) | 84 (6.1%<br>[4.9–7.7]) | 289 (12.0%<br>[10.5–13.6]) |
| Abbreviations: BMI, body mass index; CI, confidence interval; MI, myocardial infarction; US, United States |                              |                               |                              |                              |                              |                              |                        |                            |
